# Supplementary material for: Palladium metallene for nitric oxide electroreduction to ammonia
Source: Royal Society of Chemistry journal article supplement (doi:10.1039/d3cc00131h), 2023-01-01
Supplement: d3cc00131h1.pdf [file d3cc00131h1.pdf]

## Experimental Section

### *Synthesis of Pd metallene*

All chemicals were used as received without further purification. Pd metallene were synthesized by a simple wet-chemistry strategy[1]. Briefly, 20 mg of Pd(acac)<sub>2</sub> and 0.25 g of trin-octylphosphine oxide (TOPO) were ultrasonically dissolved in octanoic acid (OA) and maintained at 60 °C in an oil bath. Then, 20 mg of Mo(CO)<sub>6</sub> and 5 mL of DMF were added into the above mixture and maintained for 1h. The black precipitates were collected by centrifugation and washed.

### *Electrochemical experiments*

Electrochemical measurements were performed on a CHI-660 electrochemical workstation (CHI-660E) in a three-electrode configuration, where carbon cloth (CC)-loaded catalyst (0.5 mg cm<sup>-2</sup>), Ag/AgCl electrode and graphite rod were used as working, reference and counter electrodes, respectively. All potentials were referenced to reversible hydrogen electrode (RHE) by following equation:  $E_{\text{RHE}}(\text{V}) = E_{\text{Ag/AgCl}} + 0.198 + 0.059 \times \text{pH}$ . The electrocatalytic NORR measurements were performed in NO saturated 0.5 M Na<sub>2</sub>SO<sub>4</sub> electrolyte using a gas-tight H-cell separated by a Nafion 211 membrane. The Nafion membrane was pretreated by boiling it in 5% H<sub>2</sub>O<sub>2</sub> solution for 1 h, 0.5 M H<sub>2</sub>SO<sub>4</sub> for 1 h and deionized water for 1 h in turn. Prior to NORR test, all the feeding gases were purified through two glass bubblers containing 4 M KOH solution and the cathodic compartment was purged with Ar for at least 30 min to remove residual oxygen. During each electrolysis, high-purity NO gas (99.9%) was continuously purged into the cathodic chamber at a flow rate of 20 mL min<sup>-1</sup>. After electrolysis for 1 hour at the specified potential, water and gas products are detected by colorimetry and gas chromatography (GC, Shimadzu GC2010) respectively.

### *Determination of NH<sub>3</sub>*

The generated NH<sub>3</sub> was determined by the indophenol blue method[2]. Generally, we took 0.5mL electrolyte from the electrochemical reaction vessel and dilute it 10 times with deionized water. Then we removed 2 mL of diluted solution into a clean

vessel followed by sequentially adding NaOH solution (2 mL, 1 M) containing C<sub>7</sub>H<sub>6</sub>O<sub>3</sub> (5 wt.%) and C<sub>6</sub>H<sub>5</sub>Na<sub>3</sub>O<sub>7</sub> (5 wt.%), NaClO (1 mL, 0.05 M), and C<sub>5</sub>FeN<sub>6</sub>Na<sub>2</sub>O (0.2 mL, 1wt.%) aqueous solution. The mixed solution was subjected to UV-vis measurement using the absorbance at 655 nm wavelength, after the incubation for 2 h at room temperature. We calibrated the concentration-absorbance curves by the standard NH<sub>4</sub>Cl solution with a series of concentrations, and the NH<sub>3</sub> yield rate and Faradaic efficiency (FE) were calculated by the following equation[3]:

$$\text{NH}_3 \text{ yield} = (c \times V) / (17 \times t \times A) \quad (1)$$

Faradaic efficiency was determined by the following equation:

$$\text{FE}_{\text{NH}_3} = (5 \times F \times c \times V) / (17 \times Q) \times 100\% \quad (2)$$

where  $c$  ( $\mu\text{g mL}^{-1}$ ) is the measured NH<sub>3</sub> concentration,  $V$  (mL) is the volume of electrolyte in the cathode chamber,  $t$  (s) is the electrolysis time and  $A$  is the surface area of CC ( $1 \times 1 \text{ cm}^2$ ),  $F$  ( $96500 \text{ C mol}^{-1}$ ) is the Faraday constant,  $Q$  (C) is the total quantity of applied electricity.

The detailed procedures for colorimetric determination N<sub>2</sub>H<sub>4</sub> are provided in our previous publications[4]

### ***Characterizations***

X-ray diffraction (XRD) pattern was gathered on a Rigaku D/max 2400 diffractometer[5]. X-ray photoelectron spectroscopy (XPS) analysis was gathered on a PHI 5702 spectrometer. Atom force microscopy (AFM) was performed on a Nanoscope-IIIa scanning probe microscope. Transmission electron microscopy (TEM), high-resolution transmission electron microscopy (HRTEM) and selected area electron diffraction (SAED) were recorded on a Tecnai G<sup>2</sup> F20 microscope.

### ***Calculation details***

DFT calculations were performed using the Cambridge sequential total energy package (CASTEP) with projector augmented wave pseudopotentials. The Perdew-Burke-Ernzerhof (PBE) generalized gradient approximation (GGA) functional was used for the exchange-correlation potential. The van der Waals interaction was described by using the empirical correction in Grimme's scheme, i.e., DFT+D. The electron wave functions were expanded using plane waves with a cutoff energy of 450

eV, and a Monkhorst-Pack grid  $3 \times 3 \times 1$  was used for k-point sampling. Besides, the convergence thresholds of energy and forces were set to be  $1 \times 10^{-5}$  eV and 0.02 eV  $\text{\AA}^{-1}$ , respectively. Pd (111) was modeled by a  $4 \times 4$  supercell, and a vacuum region of 10  $\text{\AA}$  was used to separate adjacent slabs.

The free energies ( $\Delta G$ , 298 K) for each reaction were given after correction:

$$\Delta G = \Delta E + \Delta ZPE - T\Delta S \quad (3)$$

where  $\Delta E$  is the adsorption energy,  $\Delta ZPE$  is the zero-point energy difference and  $T\Delta S$  is the entropy difference between the gas phase and adsorbed state.

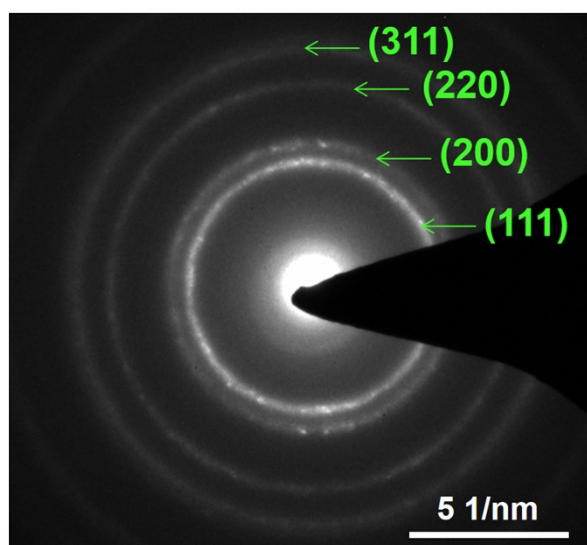

Fig. S1. SAED pattern of Pd metallene.

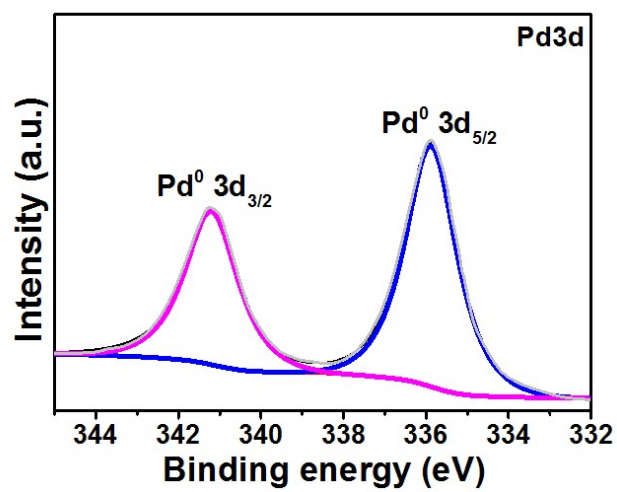

Fig. S2. XPS spectra of Pd3d spectrum.

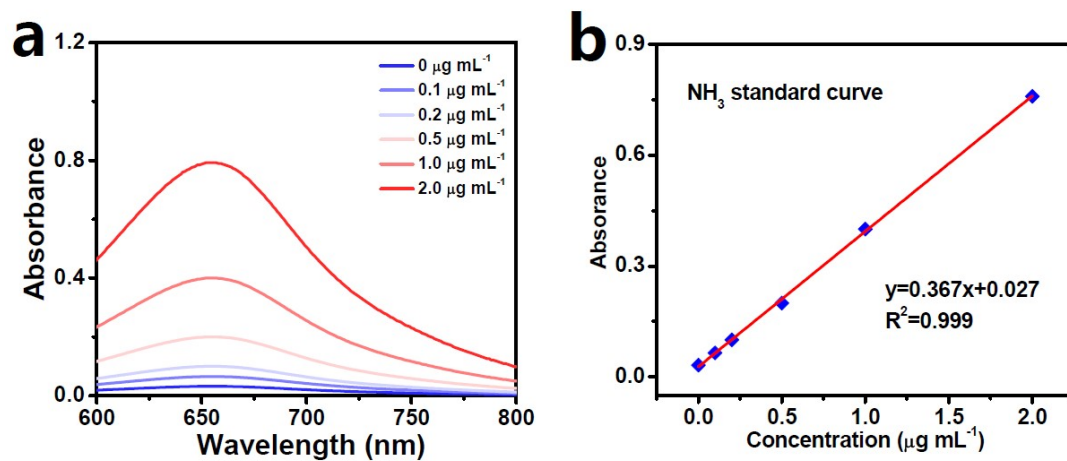

Fig. S3. (a) UV-vis absorption spectra of  $\text{NH}_4^+$  assays after incubated for 2 h at ambient conditions. (b) Calibration curve used for the calculation of  $\text{NH}_3$  concentrations.

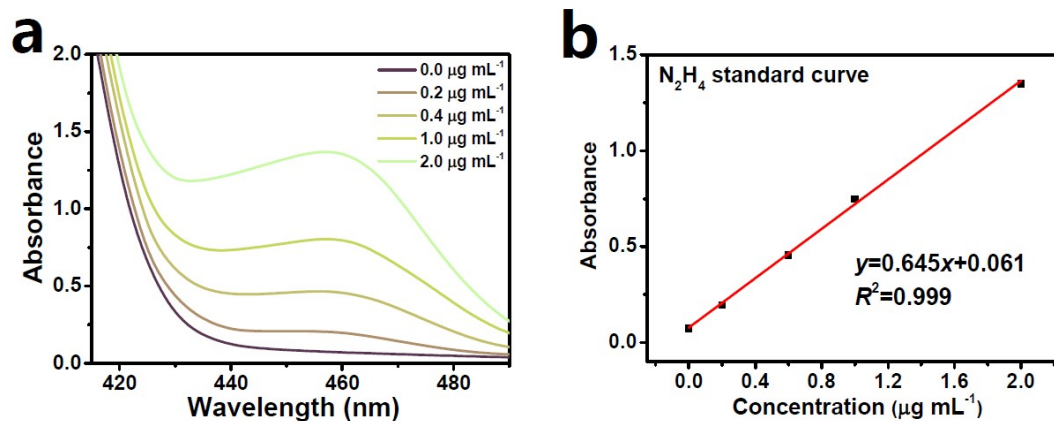

Fig. S4. (a) UV-vis absorption spectra of  $N_2H_4$  assays after incubated for 20 min at ambient conditions. (b) Calibration curve used for calculation of  $N_2H_4$  concentrations.

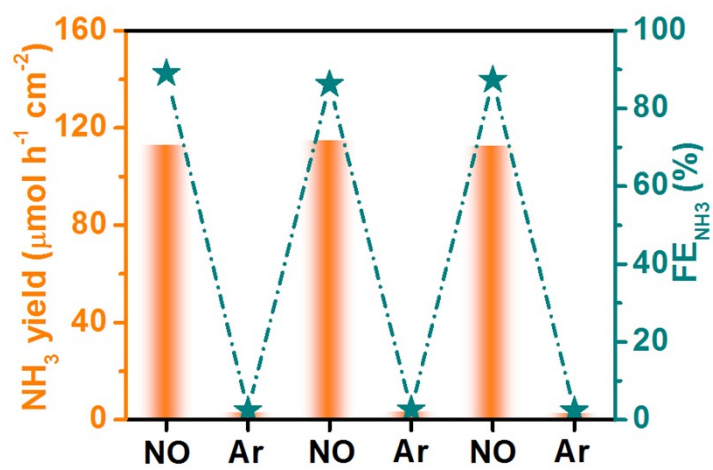

Fig. S5. NO/Ar switching experiment at -0.3 V.



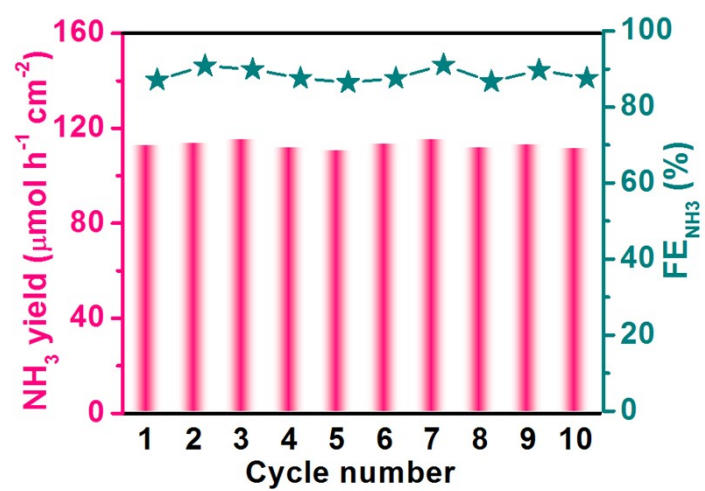

Fig. S6. Cycling test of Pd metallene at -0.3 V.

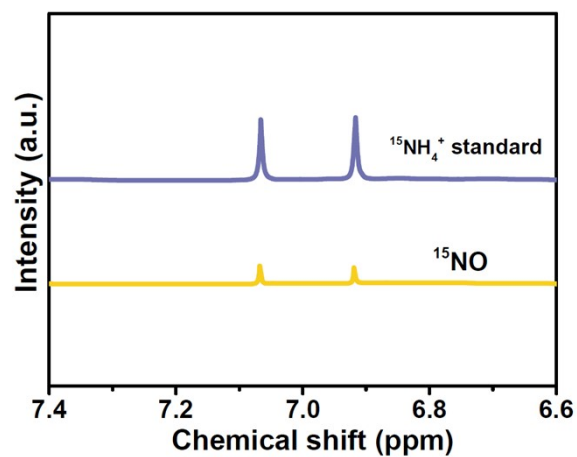

Fig. S7.  $^1\text{H}$  NMR spectra of  $^{15}\text{NH}_4^+$  standard sample and those fed by  $^{15}\text{NO}$  and Ar after NORR electrolysis on Pd metallene at -0.3 V. The detailed procedure for NMR measurement was provided in our previous publication[6].

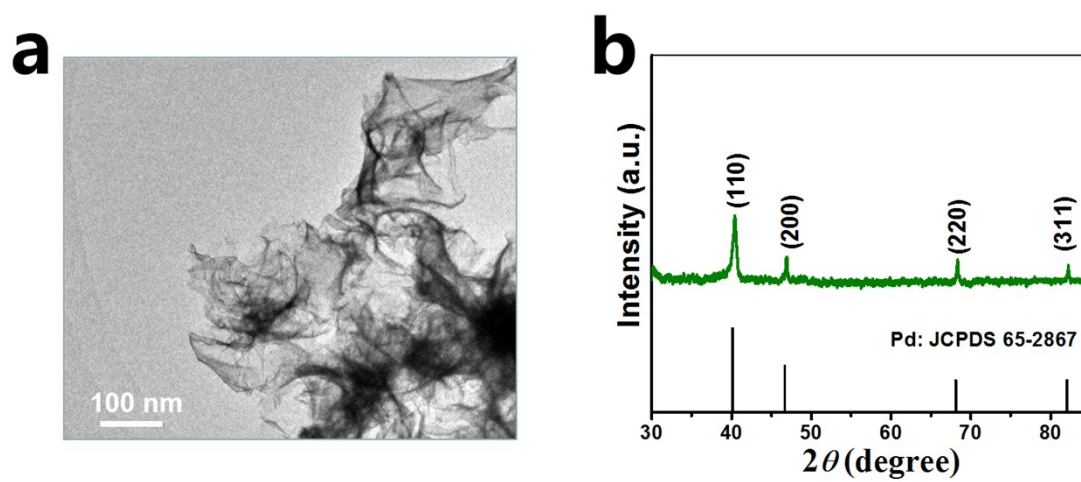

Fig. S8. (a) TEM image and (b) XRD pattern of Pd metallene after stability test.

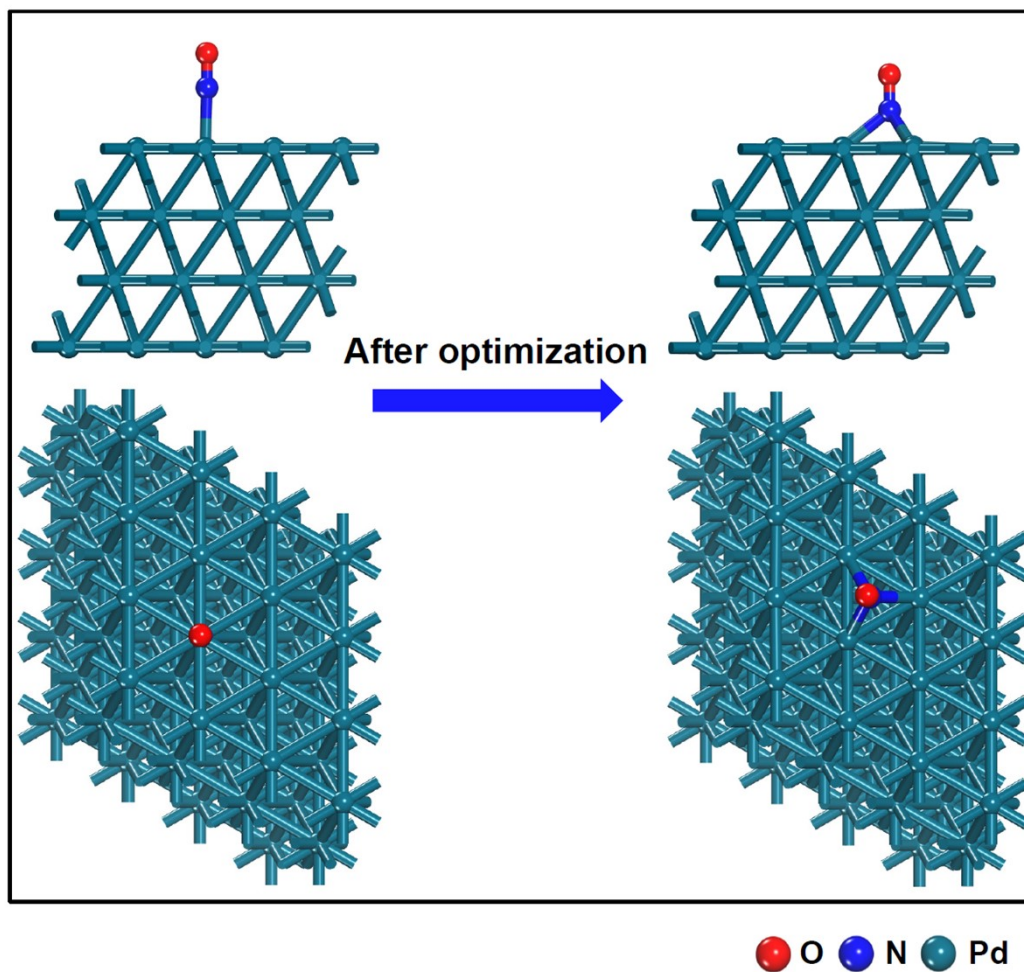

Fig. S9. The configuration of \*NO on the top site of Pd before and after geometry optimization.

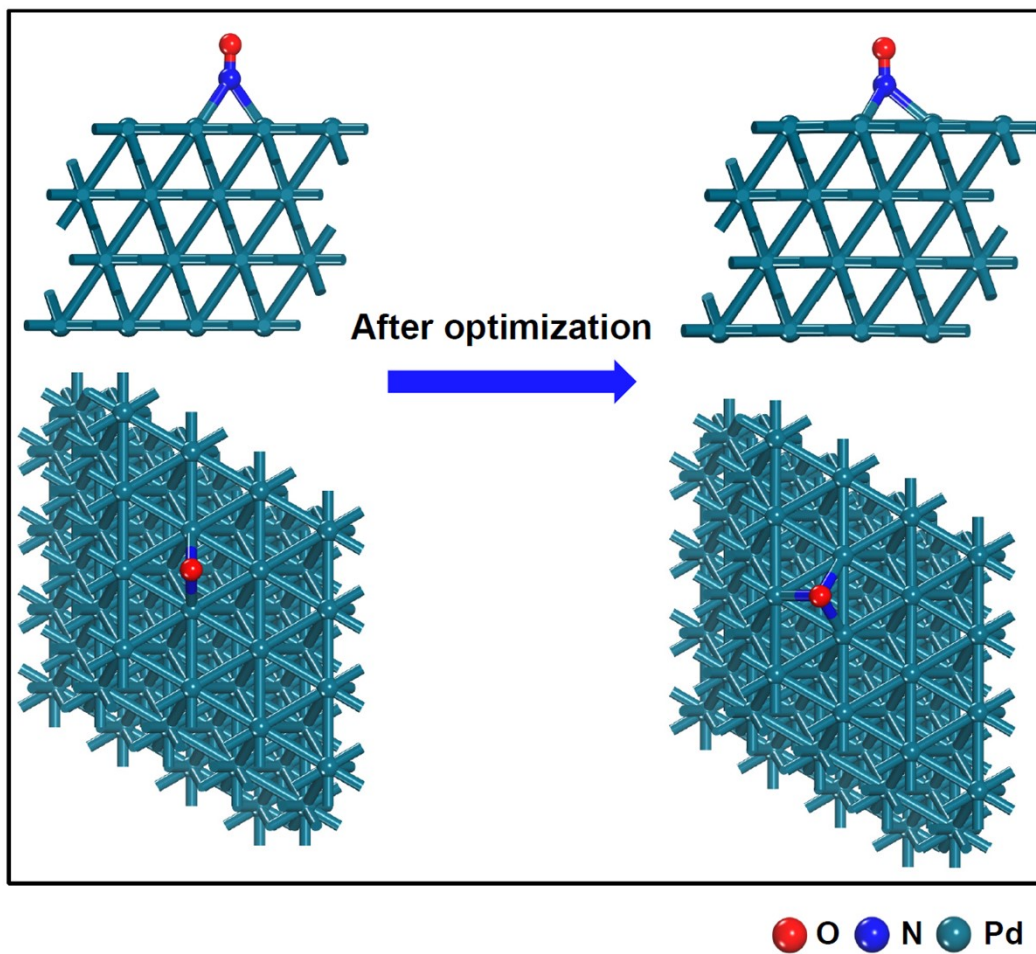

Fig. S10. The configuration of \*NO on the bridge site of Pd before and after geometry optimization.

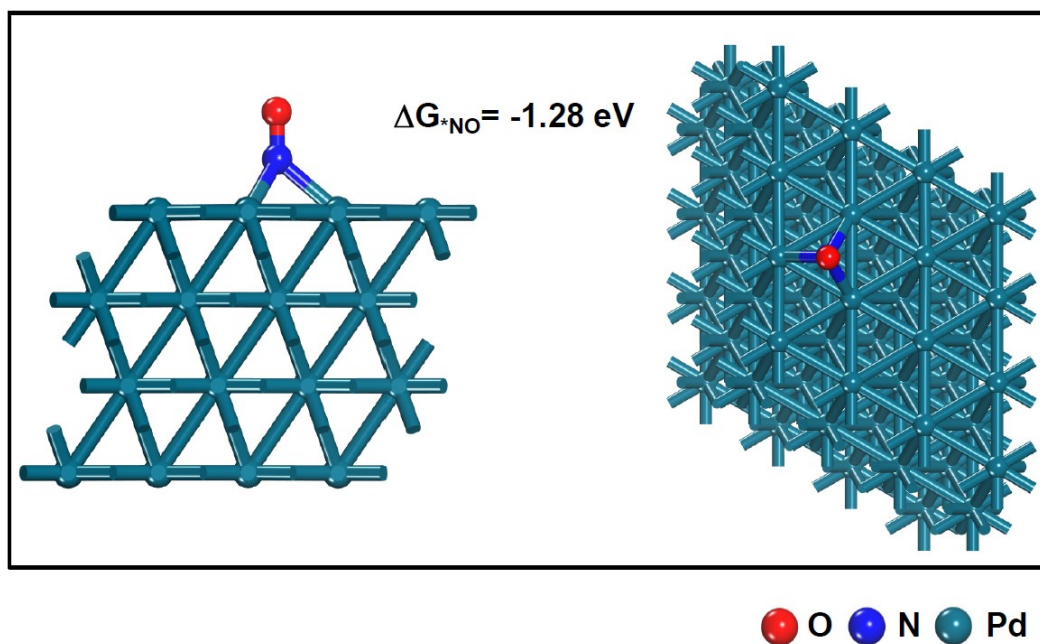

Fig. S11. The configuration of \*NO on the fcc site of Pd after geometry optimization.

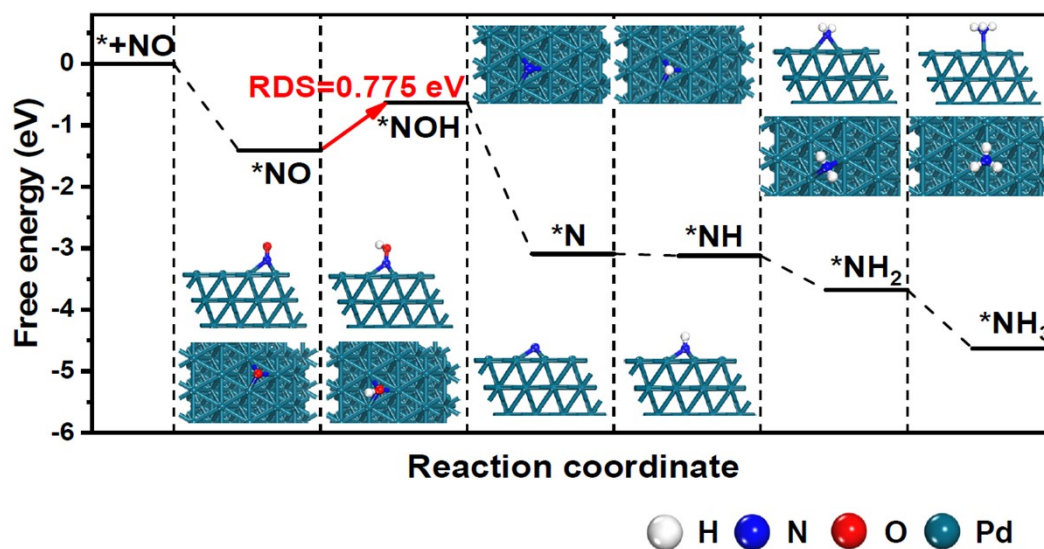

Fig. S12. Free energy diagram of the distal-O reaction pathway on hcp site of Pd and optimized configurations of NORR intermediates.

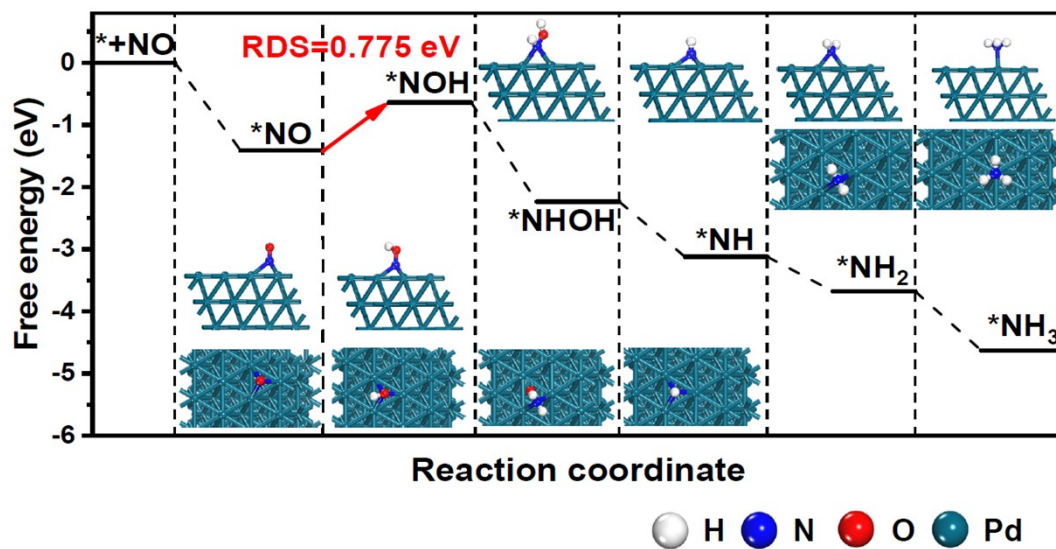

Fig. S13. Free energy diagram of the alternating-O reaction pathway on hcp site of Pd and optimized configurations of NORR intermediates.



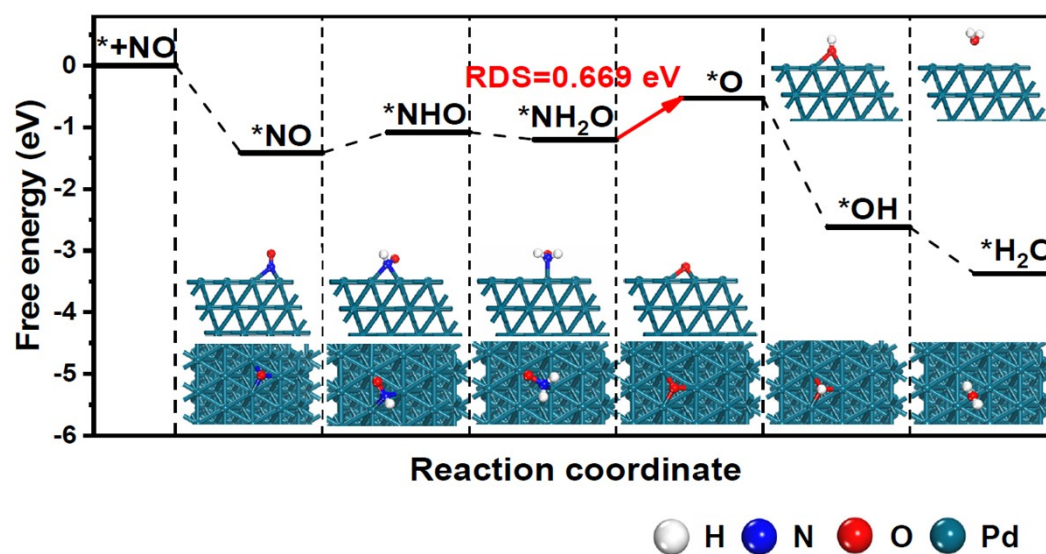

Fig. S14. Free energy diagram of the distal-N reaction pathway on hcp site of Pd and optimized configurations of NORR intermediates.

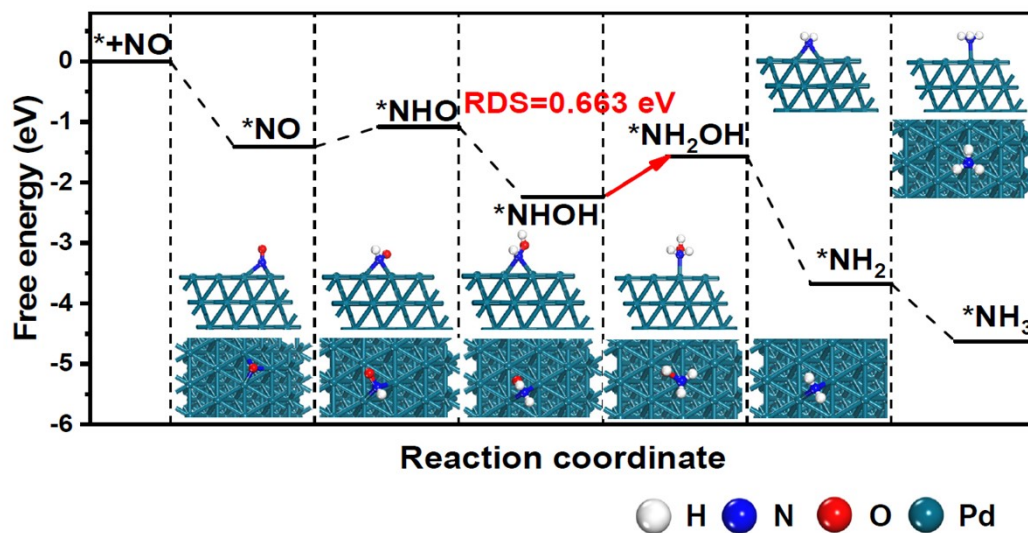

Fig. S15. Free energy diagram of the alternating-N reaction pathway on hcp site of Pd and optimized configurations of NORR intermediates.

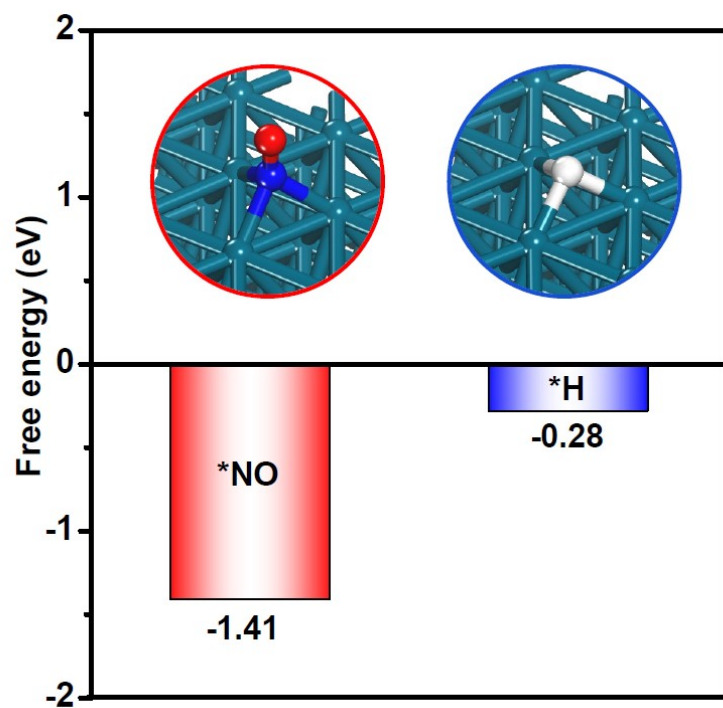

Fig. S16. Binding free energies of  $\text{*NO}$  and  $\text{*H}$  on hcp site of Pd.

Table S1. Comparison of optimum NH<sub>3</sub> yield and Faradic efficiency (FE) for recently reported state-of-the-art NORR electrocatalysts at ambient conditions.

| Catalyst                                           | Electrolyte                               | NH <sub>3</sub><br>yield rate<br>( $\mu\text{mol h}^{-1} \text{ cm}^{-2}$ ) | FE<br>(%)   | Potential<br>(V vs. RHE) | Ref.             |
|----------------------------------------------------|-------------------------------------------|-----------------------------------------------------------------------------|-------------|--------------------------|------------------|
| Mo <sub>2</sub> C                                  | 0.5 M Na <sub>2</sub> SO <sub>4</sub>     | 122.7                                                                       | 86.3        | -0.4                     | [7]              |
| Ni <sub>2</sub> P/CP                               | 0.1 M HCl                                 | 33.47                                                                       | 76.9        | -0.2                     | [8]              |
| Ru <sub>0.05</sub> Cu <sub>0.95</sub>              | 0.05 M Na <sub>2</sub> SO <sub>4</sub>    | 17.68                                                                       | 64.9        | -0.5                     | [9]              |
| Cu <sub>2</sub> O@CoMn <sub>2</sub> O <sub>4</sub> | 0.1 M Na <sub>2</sub> SO <sub>4</sub>     | 94.18                                                                       | 75.05       | -0.9                     | [10]             |
| NiO/TM                                             | 0.1 M Na <sub>2</sub> SO <sub>4</sub>     | 125.3                                                                       | 90          | -0.6                     | [11]             |
| a-B <sub>2.6</sub> C@TiO <sub>2</sub> /Ti          | 0.1 M Na <sub>2</sub> SO <sub>4</sub>     | 216.4                                                                       | 87.6        | -0.9                     | [12]             |
| FeP/CC                                             | 0.2 M PBS                                 | 85.62                                                                       | 88.49       | -0.2                     | [13]             |
| Bi NDs                                             | 0.1 M Na <sub>2</sub> SO <sub>4</sub>     | 70.2                                                                        | 89.2        | -0.5                     | [14]             |
| CoP/TM                                             | 0.2 M Na <sub>2</sub> SO <sub>4</sub>     | 47.22                                                                       | 88.3        | -0.2                     | [15]             |
| Ni@NC                                              | 0.1 M HCl                                 | 34.6                                                                        | 72.3        | 0.16                     | [16]             |
| <b>Pd metallene</b>                                | <b>0.5 M Na<sub>2</sub>SO<sub>4</sub></b> | <b>112.5</b>                                                                | <b>89.6</b> | <b>-0.3</b>              | <b>This Work</b> |

## Reference

- [1]. X. Li, P. Shen, Y. Luo, Y. Li, Y. Guo, H. Zhang and K. Chu, *Angew. Chem. Int. Edit.*, 2022, **134**, e202205923.
- [2]. N. B. Schmidt, J. D. Buckner, A. Pusser, K. Woolaway-Bickel, J. L. Preston and A. Norr, *Behavior Therapy*, 2012, **43**, 518-532.
- [3]. C.-Z. He, Y.-X. Zhang, J. Wang and L. Fu, *Rare Metals*, 2022, **41**, 3456-3465.
- [4]. Y. Luo, K. Chen, P. Shen, X. Li, X. Li, Y. Li and K. Chu, *J. Colloid Interf. Sci.*, 2023, **629**, 950-957.
- [5]. J. Wu and Y.-X. Yu, *Int. J. Hydrogen Energy*, 2022.
- [6]. X. Li, G. Zhang, P. Shen, X. Zhao and K. Chu, *Inorg. Chem. Front.*, 2023, **10**, 280-287.
- [7]. K. Chen, P. Shen, N. Zhang, D. Ma and K. Chu, *Inorg. Chem.*, 2023, DOI: 10.1021/acs.inorgchem.2c03714.
- [8]. T. Mou, J. Liang, Z. Ma, L. Zhang, Y. Lin, T. Li, Q. Liu, Y. Luo, Y. Liu, S. Gao, H. Zhao, A. M. Asiri, D. Ma and X. Sun, *J. Mater. Chem. A*, 2021, **9**, 24268-24275.
- [9]. J. Shi, C. Wang, R. Yang, F. Chen, N. Meng, Y. Yu and B. Zhang, *Sci. China Chem.*, 2021, **64**, 1493-1497.
- [10]. C. Bai, S. Fan, X. Li, Z. Niu, J. Wang, Z. Liu and D. Zhang, *Adv. Funct. Mater.*, 2022, **32**, 2205569.
- [11]. P. Liu, J. Liang, J. Wang, L. Zhang, J. Li, L. Yue, Y. Ren, T. Li, Y. Luo, N. Li, B. Tang, Q. Liu, A. M. Asiri, Q. Kong and X. Sun, *Chem. Commun.*, 2021, **57**, 13562-13565.
- [12]. J. Liang, P. Liu, Q. Li, T. Li, L. Yue, Y. Luo, Q. Liu, N. Li, B. Tang, A. A. Alshehri, I. Shakir, P. O. Agboola, C. Sun and X. Sun, *Angew. Chem. Int. Ed.*, 2022, **61**, e202202087.
- [13]. J. Liang, Q. Zhou, T. Mou, H. Chen, L. Yue, Y. Luo, Q. Liu, M. S. Hamdy, A. A. Alshehri, F. Gong and X. Sun, *Nano Res.*, 2022, **15**, 4008-4013.
- [14]. Y. Lin, J. Liang, H. Li, L. Zhang, T. Mou, T. Li, L. Yue, Y. Ji, Q. Liu, Y. Luo, N. Li, B. Tang, Q. Wu, M. S. Hamdy, D. Ma and X. Sun, *Mater. Today Phys.*, 2022, **22**.
- [15]. J. Liang, W.-F. Hu, B. Song, T. Mou, L. Zhang, Y. Luo, Q. Liu, A. A. Alshehri, M. S. Hamdy, L.-M. Yang and X. Sun, *Inorg. Chem. Front.*, 2022, **9**, 1366-1372.
- [16]. S. Sethuram Markandaraj, T. Muthusamy and S. Shanmugam, *J. Adv. Sci*, 2022, **9**, 2201410.
